# Supplementary material for: Patient-Derived Organoids Recapitulate Pathological Intrinsic and Phenotypic Features of Fibrous Dysplasia
Source: MDPI journal article supplement (doi:10.3390/cells13090729), 2024-04-23
Supplement: s1 [file s1]

**Table S1.** The canonical markers for the 8 cell types identified within the FD tissue

| <b>Cell Type</b>   | <b>Canonical Marker Genes</b>           | <b>References</b> |
|--------------------|-----------------------------------------|-------------------|
| Myofibroblast      | <i>ACTA2, TAGLN, TPM2</i>               | [1]               |
| Osteoblast         | <i>SFRP4, SP7, RUNX2, ALPL</i>          | [2,3]             |
| Fibroblast type 1  | <i>KCNMA1, ABI3BP, SMURF2, ADAMTSL1</i> | [4–7]             |
| Fibroblast type 2  | <i>COL4A1, COL4A2, IGFBP7</i>           | [8]               |
| Proliferating cell | <i>MKI67, PCNA, TOP2A, CENPF</i>        | [9]               |
| Myogenic cell      | <i>SMYD3, NEAT1, MALAT1, BNC2</i>       | [10–13]           |
| Macrophage         | <i>CD68</i>                             | [14]              |
| Dendritic cell     | <i>HLA-DRA, CD74</i>                    | [15]              |

**Table S2.** Target genes and their primer sequences

| Gene Name                     | Forward primer (5'-3')    | Reverse primer (5'-3')   |
|-------------------------------|---------------------------|--------------------------|
| <i>ACTA2</i>                  | CTATGCCTCTGGACGCACAACT    | CAGATCCAGACGCATGATGGCA   |
| <i>TAGLN</i>                  | TCCAGGTCTGGCTGAAGAATGG    | CTGCTCCATCTGCTTGAAGACC   |
| <i>TPM2</i>                   | GAGAGGTCTGTGGCAAAGTTGG    | GGAGGTGATGTCATTGAGTGCG   |
| <i>SFRP4</i>                  | CTATGACCGTGGCGTGTGCATT    | GCTTAGGCGTTTACAGTCAACATC |
| <i>RUNX2</i>                  | TGGTTACTGTCATGGCGGGTA     | TCTCAGATCGTTGAACCTTGCTA  |
| <i>BICC1</i>                  | GATGTGTCCCTCCAAGTTTCC     | GGCTTTCGGTAGCACTCAGTTC   |
| <i>DCN</i>                    | GCTCTCCTACATCCGCATTGCT    | GTCCTTTCAGGCTAGCTGCATC   |
| <i>FBLN</i>                   | GGATACACAGGTGATGGCTTCAC   | GTCGCATTACACAGCGGTATCCT  |
| <i>ADAMTSL1</i>               | TGACATCGGCTGAGTGCTACGA    | GGCATGATCTGCTTGTATCCGTC  |
| <i>KCNMA1</i>                 | TATCTCTCCAGTGCCTTCGTGG    | CTCTCTCGGTTGGCAGACTTGT   |
| <i>SMURF2</i>                 | TCCTCGGCTGTCTGCTAACTTG    | CAGGCATTCTGTGTCATCAGGAC  |
| <i>AB13BP</i>                 | CCTTCTACACCTAAACGACGCC    | GGTGTGTCCATGTAGGTTTCAGG  |
| <i>COL4A1</i>                 | TGTTGACGGCTTACCTGGAGAC    | GGTAGACCAACTCCAGGCTCTC   |
| <i>COL4A2</i>                 | GGATAACAGGCGTGACTGGAGT    | CTTTGCCACCAGGCAGTCCAAT   |
| <i>IGFBP7</i>                 | GCCATCACCCAGGTCAGCAAG     | GGATTCCGATGACCTCACAGCT   |
| <i>MKI67</i>                  | GAAAGAGTGGCAACCTGCCTTC    | GCACCAAGTTTACTACATCTGCC  |
| <i>PCNA</i>                   | CAAGTAATGTCGATAAAGAGGAGG  | GTGTCACCGTTGAAGAGAGTGG   |
| <i>TOP2</i>                   | GTGGCAAGGATTCTGCTAGTCC    | ACCATTTCAGGCTCAACACGCTG  |
| <i>CENPF</i>                  | AGCACGACTCCAGCTACAAGGT    | CATCATGCTTTGGTGTCTTTCTG  |
| <i>SMYD3</i>                  | TACTGCGAGCAGTCCGAGACA     | TTGTCCTGGGTTTGGCAACGGA   |
| <i>NEAT1</i>                  | GCTGGACCTTTCATGTAACGGG    | TGAACTCTGCCGGTACAGGGAA   |
| <i>BNC2</i>                   | ACTCTGCGGGACTATGTCCGAG    | ACCGCAGAACTGCTGAAGGGT    |
| <i>HLA-DRA</i>                | AGCTGTGGACAAAGCCAACTG     | CTCTCAGTTCCACAGGGCTGTT   |
| <i>CD74</i>                   | AAGCCTGTGAGCAAGATGCGCA    | AGCAGGTGCATCACATGGTCCT   |
| <i>CD68</i>                   | CGAGCATCATTCTTTCACCAGCT   | ATGAGAGGCAGCAAGATGGACC   |
| <i>MMP9</i>                   | GCCACTACTGTGCCTTTGAGTC    | CCCTCAGAGAATCGCCAGTACT   |
| <i>OSX/SP7</i>                | CTGCGGGACTCAACAACCTCT     | GAGCCATAGGGGTGTGTCAT     |
| <i>DLX5</i>                   | GAGTAGGTGTCCCGCCTCAGAACCC | CCAACCAGCCAGAGAAAGAA     |
| <i>ALPL</i>                   | ACCACCACGAGAGTGAACCA      | CGTTGTCTGAGTACCAGTCCC    |
| <i>OCN/BGLAP</i>              | CACTCCTCGCCCTATTGGC       | CCCTCCTGCTTGGACACAAAG    |
| <i>OPN/SPP1</i>               | GCCGAGGTGATAGTGTGGTT      | GCTTTCCATGTGTGAGGTGAT    |
| <i>DMP1</i>                   | GATCAGCATCCTGCTCATGTT     | AGCCAAATGACCCTTCCATTC    |
| <i>SOST</i>                   | CCCTTTGAGACCAAAGACGTG     | GGCCCATCGGTCACGTAG       |
| <i>RANKL</i>                  | CCAAGATCTCCAACATGACTTAC   | ACCATTAGTTGAAGATACT      |
| <i>CAPG</i>                   | CTCCATTCCCAGGCTCAGT       | GAAACCTCTTCTGGGCCATT     |
| <i>TRAP/ACP5</i>              | TTCTACCGCCTGCACTCCAA      | AGCTGATCTCCACATAGGCA     |
| <i>IL1<math>\beta</math></i>  | AAACAGATGAAGTGCTCCTTCCAGG | TGGAGAACACCACTTGTGCTCCA  |
| <i>TNF<math>\alpha</math></i> | CTTCTTCTCCTTCTGATCGTGG    | GCTGGTTATCTCTCAGCTCCA    |
| <i>COL1A1</i>                 | GTGCGATGACGTGATCTGTGA     | CGGTGGTTTCTTGGTCCGT      |
| <i>TGF<math>\beta</math>1</i> | TCGCCAGAGTGGTTATCTT       | TAGTGAACCCGTTGATGTCC     |
| <i>PLOD2</i>                  | GACAGCGTTCTCTTCGTCTCTCA   | CTCCAGCCTTTTCGTGGTGACT   |
| <i>GAPDH</i>                  | ACAGTTGCCATGTAGACC        | TTTTTGGTTGAGCACAGG       |

**Table S3.** Cell counts and proportion per sample per cluster. The percentage of samples' cells in the cluster as indicated in brackets.

| Cluster           | FD3          | FD4          | FD5          |
|-------------------|--------------|--------------|--------------|
| Myofibroblast     | 3,154 (38.1) | 3,676 (37.6) | 2,055 (17.2) |
| Osteoblast        | 2,358 (28.5) | 1,969 (20.1) | 3,744 (31.3) |
| Fibroblast type 1 | 1,358 (16.4) | 2,229 (22.8) | 3,004 (25.1) |
| Fibroblast type 2 | 567 (6.8)    | 845 (8.6)    | 1,168 (9.8)  |
| Proliferating S   | 345 (4.2)    | 359 (3.7)    | 831 (6.9)    |
| Proliferating G2M | 389 (4.7)    | 389 (4.0)    | 602 (5.0)    |
| Myogenic          | 66 (0.8)     | 132 (1.4)    | 362 (3.0)    |
| MPS               | 51 (0.6)     | 175 (1.8)    | 202 (1.7)    |

## Supplementary references

1. Peyser, R.; MacDonnell, S.; Gao, Y.; Cheng, L.; Kim, Y.; Kaplan, T.; Ruan, Q.; Wei, Y.; Ni, M.; Adler, C.; et al. Defining the Activated Fibroblast Population in Lung Fibrosis Using Single-Cell Sequencing. *Am. J. Respir. Cell Mol. Biol.* **2019**, *61*, 74–85.
2. Komori, T. Regulation of Proliferation, Differentiation and Functions of Osteoblasts by Runx2. *Int. J. Mol. Sci.* **2019**, *20*, 1694.
3. Silvent, J.; Nassif, N.; Helary, C.; Azaïs, T.; Sire, J.-Y.; Guille, M.M.G. Collagen Osteoid-Like Model Allows Kinetic Gene Expression Studies of Non-Collagenous Proteins in Relation with Mineral Development to Understand Bone Biomineralization. *PLoS ONE* **2013**, *8*, e57344.
4. Wang, Y.; Guo, Q.; Hei, H.; Tao, J.; Zhou, Y.; Dong, J.; Xin, H.; Cai, H.; Gao, J.; Yu, K.; et al. BK Ablation Attenuates Osteoblast Bone Formation via Integrin Pathway. *Cell Death Dis.* **2019**, *10*, 738.
5. Hodgkinson, C.P.; Naidoo, V.; Patti, K.G.; Gomez, J.A.; Schmeckpeper, J.; Zhang, Z.; Davis, B.; Pratt, R.E.; Mirotso, M.; Dzau, V.J. Abi3bp Is a Multifunctional Autocrine/Paracrine Factor That Regulates Mesenchymal Stem Cell Biology. *Stem Cells* **2013**, *31*, 1669–1682.
6. Manikoth Ayyathan, D.; Koganti, P.; Marcu-Malina, V.; Litmanovitch, T.; Trakhtenbrot, L.; Emanuelli, A.; Apel-Sarid, L.; Blank, M. SMURF2 Prevents Detrimental Changes to Chromatin, Protecting Human Dermal Fibroblasts from Chromosomal Instability and Tumorigenesis. *Oncogene* **2020**, *39*, 3396–3410.
7. Rypdal, K.B.; Erusappan, P.M.; Melleby, A.O.; Seifert, D.E.; Palmero, S.; Strand, M.E.; Tønnessen, T.; Dahl, C.P.; Almaas, V.; Hubmacher, D.; et al. The Extracellular Matrix Glycoprotein ADAMTSL2 Is Increased in Heart Failure and Inhibits TGFβ Signalling in Cardiac Fibroblasts. *Sci. Rep.* **2021**, *11*, 19757.
8. Kreus, M.; Lehtonen, S.; Skarp, S.; Kaarteenaho, R. Extracellular Matrix Proteins Produced by Stromal Cells in Idiopathic Pulmonary Fibrosis and Lung Adenocarcinoma. *PloS One* **2021**, *16*, e0250109.
9. Li, R.; Wang, T.; Shelp-Peck, E.; Wu, S.-P.; DeMayo, F.J. The Single-Cell Atlas of Cultured Human Endometrial Stromal Cells. *FS Sci.* **2022**, *3*, 349–366.
10. Bobowski-Gerard, M.; Boulet, C.; Zummo, F.P.; Dubois-Chevalier, J.; Gheeraert, C.; Bou Saleh, M.; Strub, J.-M.; Farce, A.; Ploton, M.; Guille, L.; et al. Functional Genomics Uncovers the Transcription Factor BNC2 as Required for Myofibroblastic Activation in Fibrosis. *Nat. Commun.* **2022**, *13*, 5324.
11. Codato, R.; Perichon, M.; Divol, A.; Fung, E.; Sotiropoulos, A.; Bigot, A.; Weitzman, J.B.; Medjkane, S. The SMYD3 Methyltransferase Promotes Myogenesis by Activating the Myogenin Regulatory Network. *Sci. Rep.* **2019**, *9*, 17298.
12. Liu, C.; Gao, X.; Li, Y.; Sun, W.; Xu, Y.; Tan, Y.; Du, R.; Zhong, G.; Zhao, D.; Liu, Z.; et al. The Mechanosensitive lncRNA Neat1 Promotes Osteoblast Function through Paraspeckle-Dependent Smurf1 mRNA Retention. *Bone Res.* **2022**, *10*, 18.
13. Chen, X.; He, L.; Zhao, Y.; Li, Y.; Zhang, S.; Sun, K.; So, K.; Chen, F.; Zhou, L.; Lu, L.; et al. Malat1 Regulates Myogenic Differentiation and Muscle Regeneration through Modulating MyoD Transcriptional Activity. *Cell Discov.* **2017**, *3*, 17002.
14. Bisgaard, L.S.; Mogensen, C.K.; Rosendahl, A.; Cucak, H.; Nielsen, L.B.; Rasmussen, S.E.; Pedersen, T.X. Bone Marrow-Derived and Peritoneal Macrophages Have Different Inflammatory Response to oxLDL and M1/M2 Marker Expression - Implications for Atherosclerosis Research. *Sci. Rep.* **2016**, *6*, 35234.
15. Li, Y.; Jeong, J.; Song, W. Molecular Characteristics and Distribution of Adult Human Corneal Immune Cell Types. *Front. Immunol.* **2022**, *13*, 798346.
