# Supplementary material for: Patient-Derived Organoids Recapitulate Pathological Intrinsic and Phenotypic Features of Fibrous Dysplasia
Source: Cells. 2024 Apr 23;13(9):729. doi: 10.3390/cells13090729 (PMC11083396; doi:10.3390/cells13090729)
Supplement: Supplementary file 1 [file cells-13-00729-s001.zip]

Archive with 8 entries (8 files):
- __MACOSX/._Patient Consent Form.docx
- __MACOSX/._V2_Supplemental Figures.docx
- __MACOSX/._Supplemental Tables.docx
- Supplementary File.xlsx
- __MACOSX/._Supplementary File.xlsx
- Patient Consent Form.pdf
- Supplemental Tables.pdf
- V2_Supplemental Figures.pdf
