# Supplementary material for: Patient-Derived Organoids Recapitulate Pathological Intrinsic and Phenotypic Features of Fibrous Dysplasia
Source: Cells. 2024 Apr 23;13(9):729. doi: 10.3390/cells13090729 (PMC11083396; doi:10.3390/cells13090729)
Supplement: Supplementary file 1 [file cells-13-00729-s001.zip › Supplementary File.xlsx]

## Sheet: Sheet1
Supplementary Data 1: Top 20 DEGs of Clusters
p_val	avg_log2FC	pct.1	pct.2	p_val_adj	Cluster	Gene
0	1.1343	0.866	0.678	0	Myofibroblast	ACTA2
0	0.989299	0.977	0.873	0	Myofibroblast	TAGLN
0	0.826687	0.99	0.94	0	Myofibroblast	TPM2
0	0.821818	0.985	0.898	0	Myofibroblast	MYL9
0	0.802854	0.494	0.231	0	Myofibroblast	KRT7
0	0.788278	0.925	0.786	0	Myofibroblast	GAS6
3.31647e-295	0.782037	0.885	0.751	8.1721e-291	Myofibroblast	HSPA5
0	0.728797	0.945	0.822	0	Myofibroblast	MYDGF
6.09117e-257	0.71896	0.671	0.483	1.50092e-252	Myofibroblast	IGFBP3
0	0.698272	0.839	0.639	0	Myofibroblast	SLC3A2
0	0.69105	0.952	0.87	0	Myofibroblast	SPARC
6.47475e-160	0.643056	0.319	0.177	1.59544e-155	Myofibroblast	PTGDS
0	0.639979	0.903	0.735	0	Myofibroblast	PRSS23
0	0.639838	0.966	0.861	0	Myofibroblast	NUPR1
0	0.625864	0.958	0.853	0	Myofibroblast	IGFBP4
0	0.618676	0.938	0.91	0	Myofibroblast	COL1A1
3.29478e-275	0.615763	0.797	0.645	8.11867e-271	Myofibroblast	ID3
0	0.60598	0.993	0.955	0	Myofibroblast	MYL6
3.40771e-296	0.596733	0.91	0.831	8.39693e-292	Myofibroblast	TGFBI
0	0.594069	0.983	0.931	0	Myofibroblast	NDUFA4
0	2.23728	0.517	0.162	0	Osteoblast	SFRP4
0	1.15281	0.858	0.497	0	Osteoblast	RUNX2
0	1.10762	0.936	0.678	0	Osteoblast	BICC1
0	1.10224	0.885	0.589	0	Osteoblast	DCN
0	1.09143	0.806	0.508	0	Osteoblast	FBLN1
0	1.05654	0.915	0.653	0	Osteoblast	PLEKHA5
0	1.03067	0.901	0.66	0	Osteoblast	COL3A1
0	1.00734	0.752	0.412	0	Osteoblast	PLXDC2
0	0.947434	0.517	0.251	0	Osteoblast	RARRES2
0	0.93501	0.284	0.087	0	Osteoblast	CEMIP
0	0.92941	0.877	0.605	0	Osteoblast	LUM
0	0.88592	0.441	0.227	0	Osteoblast	COL10A1
0	0.88114	0.777	0.456	0	Osteoblast	GAS1
0	0.877261	0.69	0.404	0	Osteoblast	KIF26B
0	0.874757	0.816	0.603	0	Osteoblast	CTSK
0	0.862461	0.491	0.21	0	Osteoblast	MCTP2
3.76638e-290	0.843929	0.555	0.344	9.28074e-286	Osteoblast	CCN5
0	0.803236	0.794	0.518	0	Osteoblast	FNDC1
0	0.801334	0.921	0.714	0	Osteoblast	GJA1
0	0.799257	0.742	0.478	0	Osteoblast	HMCN1
0	1.19682	0.908	0.603	0	Fibroblast type 1	KCNMA1
0	1.02782	0.762	0.414	0	Fibroblast type 1	ADAMTS6
0	1.01455	0.522	0.263	0	Fibroblast type 1	ABI3BP
0	1.00232	0.788	0.52	0	Fibroblast type 1	SMURF2
0	0.982256	0.431	0.194	0	Fibroblast type 1	NRG1
0	0.971005	0.657	0.3	0	Fibroblast type 1	ADAMTSL1
0	0.92842	0.662	0.385	0	Fibroblast type 1	HAS2
0	0.89174	0.621	0.282	0	Fibroblast type 1	CCBE1
0	0.887286	0.836	0.62	0	Fibroblast type 1	WNT5B
0	0.885682	0.718	0.531	0	Fibroblast type 1	DDAH1
0	0.879013	0.892	0.665	0	Fibroblast type 1	TRIO
0	0.872291	0.672	0.363	0	Fibroblast type 1	FMN1
3.37005e-255	0.839291	0.816	0.623	8.30415e-251	Fibroblast type 1	SMYD3
6.52195e-283	0.83626	0.546	0.331	1.60707e-278	Fibroblast type 1	PLCB4
0	0.809317	0.558	0.337	0	Fibroblast type 1	CDH13
0	0.801952	0.845	0.584	0	Fibroblast type 1	NAV3
0	0.790041	0.85	0.583	0	Fibroblast type 1	TNC
0	0.782378	0.957	0.826	0	Fibroblast type 1	EXT1
0	0.776554	0.697	0.466	0	Fibroblast type 1	SLIT2
0	0.7554	0.897	0.753	0	Fibroblast type 1	MBNL1
0	2.16288	0.755	0.259	0	Fibroblast type 2	COL4A1
0	1.93081	0.824	0.427	0	Fibroblast type 2	COL4A2
0	1.79406	0.993	0.803	0	Fibroblast type 2	IGFBP7
0	1.7574	0.336	0.039	0	Fibroblast type 2	PPP1R14A
0	1.52865	0.828	0.49	0	Fibroblast type 2	PRKG1
0	1.24227	0.564	0.179	0	Fibroblast type 2	C11orf96
0	1.22132	0.302	0.046	0	Fibroblast type 2	NDUFA4L2
0	1.21834	0.539	0.143	0	Fibroblast type 2	COL14A1
0	1.21388	0.602	0.221	0	Fibroblast type 2	NR2F2
0	1.15931	0.71	0.282	0	Fibroblast type 2	EBF1
0	1.13437	0.776	0.429	0	Fibroblast type 2	CYP1B1
0	1.10422	0.749	0.254	0	Fibroblast type 2	PLAC9
2.57144e-234	1.04546	0.688	0.451	6.33629e-230	Fibroblast type 2	PAPPA
0	1.00797	0.377	0.051	0	Fibroblast type 2	PDE3A
1.99378e-258	0.992832	0.604	0.384	4.91287e-254	Fibroblast type 2	CRYAB
0	0.94617	0.88	0.72	0	Fibroblast type 2	VCAN
0	0.925622	0.46	0.101	0	Fibroblast type 2	COL5A3
1.70957e-235	0.91858	0.788	0.598	4.21254e-231	Fibroblast type 2	PSD3
5.47825e-152	0.917201	0.409	0.222	1.34989e-147	Fibroblast type 2	CCL2
7.65873e-301	0.893703	0.731	0.479	1.88719e-296	Fibroblast type 2	MYO1E
0	2.75279	0.867	0.627	0	Proliferating_S	HIST1H4C
0	1.70061	0.973	0.775	0	Proliferating_S	H2AFZ
0	1.62876	0.815	0.195	0	Proliferating_S	DIAPH3
0	1.61998	0.865	0.147	0	Proliferating_S	PCLAF
0	1.58193	0.982	0.71	0	Proliferating_S	TUBA1B
0	1.50673	0.812	0.098	0	Proliferating_S	TYMS
0	1.49705	0.816	0.202	0	Proliferating_S	HMGB2
0	1.48036	0.932	0.467	0	Proliferating_S	STMN1
0	1.42433	0.66	0.039	0	Proliferating_S	RRM2
0	1.37286	0.812	0.114	0	Proliferating_S	ATAD2
0	1.33649	0.988	0.844	0	Proliferating_S	MT2A
0	1.32624	0.786	0.032	0	Proliferating_S	CLSPN
0	1.23749	0.819	0.212	0	Proliferating_S	PCNA
0	1.19538	0.675	0.063	0	Proliferating_S	BRIP1
0	1.18027	0.611	0.048	0	Proliferating_S	TOP2A
0	1.16687	0.916	0.594	0	Proliferating_S	DUT
0	1.15935	0.962	0.737	0	Proliferating_S	DEK
0	1.15582	0.925	0.584	0	Proliferating_S	RANBP1
0	1.13882	0.837	0.413	0	Proliferating_S	FABP5
0	1.13616	0.76	0.115	0	Proliferating_S	TK1
0	2.88254	0.969	0.057	0	Proliferating_G2M	CENPF
0	2.6332	0.925	0.185	0	Proliferating_G2M	CKS2
0	2.58956	0.959	0.044	0	Proliferating_G2M	CCNB1
0	2.58883	0.973	0.465	0	Proliferating_G2M	UBE2S
0	2.57265	0.98	0.122	0	Proliferating_G2M	PTTG1
0	2.33733	0.77	0.043	0	Proliferating_G2M	TOP2A
0	2.2159	0.98	0.583	0	Proliferating_G2M	TUBB4B
0	2.20352	0.696	0.032	0	Proliferating_G2M	UBE2C
0	2.16101	0.95	0.426	0	Proliferating_G2M	ARL6IP1
0	2.1355	0.996	0.775	0	Proliferating_G2M	H2AFZ
0	2.12507	0.998	0.711	0	Proliferating_G2M	TUBA1B
0	2.09439	0.983	0.467	0	Proliferating_G2M	STMN1
0	2.03827	0.936	0.069	0	Proliferating_G2M	PRC1
0	2.01299	0.859	0.203	0	Proliferating_G2M	HMGB2
0	1.99288	0.941	0.077	0	Proliferating_G2M	CDKN3
0	1.97093	0.975	0.652	0	Proliferating_G2M	TUBA1C
0	1.97077	0.855	0.028	0	Proliferating_G2M	ASPM
0	1.93562	0.901	0.056	0	Proliferating_G2M	TPX2
0	1.90249	0.925	0.069	0	Proliferating_G2M	BIRC5
0	1.85785	0.859	0.036	0	Proliferating_G2M	MKI67
1.39004e-132	1.91102	0.605	0.666	3.4252e-128	Myogenic	SMYD3
2.4471e-286	1.69738	0.507	0.617	6.02991e-282	Myogenic	BNC2
7.77032e-171	1.58903	0.82	0.903	1.91468e-166	Myogenic	NEAT1
1.32247e-102	1.5684	0.863	0.816	3.25869e-98	Myogenic	MALAT1
7.573038e-319	1.52623	0.321	0.398	1.866072e-314	Myogenic	AL138828.1
3.0745e-174	1.50514	0.479	0.525	7.57587e-170	Myogenic	GPC6
0	1.45325	0.511	0.633	0	Myogenic	FTX
2.51942e-228	1.43653	0.814	0.97	6.20811e-224	Myogenic	MT-ATP6
5.6116e-203	1.39766	0.589	0.75	1.38275e-198	Myogenic	BICC1
1.15018e-257	1.36488	0.439	0.542	2.83415e-253	Myogenic	MAGI2
1.29127e-181	1.35139	0.461	0.568	3.18183e-177	Myogenic	KCNK2
3.78231e-275	1.34846	0.486	0.731	9.31999e-271	Myogenic	MAP4K4
1.28771e-264	1.3442	0.393	0.558	3.17305e-260	Myogenic	AC083870.1
2.35195e-307	1.32899	0.523	0.755	5.79544e-303	Myogenic	PTPRG
7.33585e-298	1.32781	0.507	0.692	1.80763e-293	Myogenic	AUTS2
1.25534e-116	1.32778	0.371	0.483	3.09329e-112	Myogenic	KIF26B
1.27495e-204	1.31297	0.355	0.506	3.14161e-200	Myogenic	PLXDC2
2.13873e-114	1.30592	0.288	0.321	5.27005e-110	Myogenic	ABI3BP
1.9671e-241	1.30254	0.457	0.613	4.84713e-237	Myogenic	DOCK4
2.34797e-232	1.29994	0.55	0.718	5.78563e-228	Myogenic	TRIO
3.10959e-154	2.79276	0.39	0.236	7.66234e-150	MPS	CCL2
2.48685e-226	2.74802	0.266	0.04	6.12784e-222	MPS	HLA-DRA
5.73391e-278	2.46797	0.325	0.078	1.41289e-273	MPS	CD74
8.86178e-238	2.29259	0.673	0.853	2.18363e-233	MPS	CTSB
2.78428e-261	2.17834	0.269	0.012	6.86075e-257	MPS	LAPTM5
0	2.16367	0.278	0.088	0	MPS	IFI30
3.42144e-224	1.9281	0.446	0.437	8.43076e-220	MPS	SOD2
1.10352e-226	1.87959	0.306	0.001	2.71917e-222	MPS	PTPRC
2.04367e-175	1.86114	0.334	0.467	5.0358e-171	MPS	NAMPT
6.0119e-144	1.83282	0.668	0.865	1.48139e-139	MPS	CTSD
0	1.71999	0.269	0.218	0	MPS	GLUL
1.27464e-209	1.69337	0.285	0.001	3.14083e-205	MPS	LCP1
0	1.50804	0.376	0.228	0	MPS	CD68
2.44726e-161	1.48722	0.57	0.729	6.03029e-157	MPS	CTSL
1.36174e-232	1.46334	0.283	0.023	3.35547e-228	MPS	ARHGDIB
2.39139e-121	1.42954	0.607	0.636	5.89262e-117	MPS	SRGN
1.52543e-71	1.41434	0.895	0.958	3.7588e-67	MPS	FTL
2.708e-221	1.26664	0.315	0.227	6.67278e-217	MPS	NFKBIA
2.61494e-156	1.22852	0.757	0.788	6.44349e-152	MPS	CYBA
6.87254e-122	1.1772	0.486	0.68	1.69346e-117	MPS	GPNMB
